# Supplementary material for: Green synthesis and evaluation of isoquercitrin imprinted polymers for class-selective separation and purification of flavonol glycosides
Source: Royal Society of Chemistry journal article supplement (doi:10.1039/c5ay00892a), 2015-01-01
Supplement: c5ay00892a1.pdf [file c5ay00892a1.pdf]

## Electronic Supplementary Information (ESI)

### Green synthesis and evaluation of isoquercitrin imprinted polymers for class-selective separation and purification of flavonol glycosides

Xiang-Jie Li<sup>a,b</sup> Xiu-Xiu Chen<sup>a,b</sup> Guan-Yin Sun<sup>a,b</sup> Yong Xin Zhao<sup>a,b</sup> Zhao-  
Sheng Liu<sup>a,b\*</sup> Haji Akber Aisa<sup>\*, a,b</sup>

Correspondence: Dr. Zhao-Sheng Liu

Fax: (+086)-022-23536746

E-mail: [zhaoshengliu@sohu.com](mailto:zhaoshengliu@sohu.com)

Correspondence: Haji Akber Aisa

E-mail: [haji@ms.xjb.ac.cn](mailto:haji@ms.xjb.ac.cn)

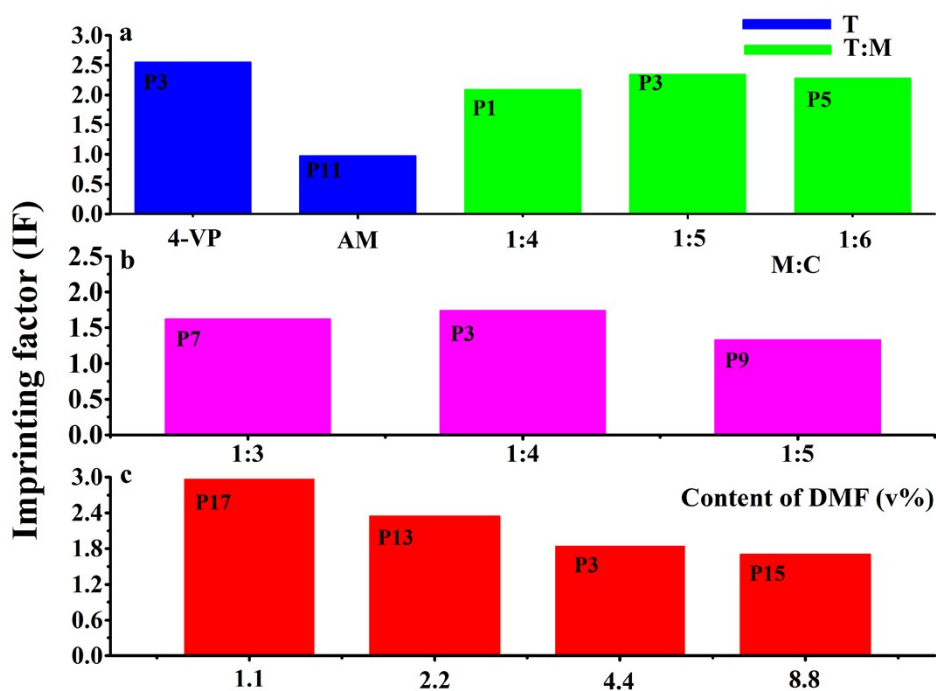

**Fig. S1.** Imprinting factors of MIPs made with the different ratio of ISO to 4-VP (a), 4-VP to EDMA (b), and DMF (c). Mobile phase, methanol/water/acetate acid (90/9/1, v/v/v); velocity of flow, 0.5 ml/min; detection wavelength, 255 nm; injection volume, 20  $\mu$ l; temperature: 30°C.

**Table S1** MISPE Protocol applied to the extraction of ISO and its analogues in the crude extract of flowers of *Gossypium herbaceum* L

| Step         | Solvent                                                       | Volume (mL) |
|--------------|---------------------------------------------------------------|-------------|
| Conditioning | Methanol                                                      | 10          |
| Loading      | Plant extract (20.18 mg/mL) in methanol:water,<br>70:30 (v/v) | 0.5         |
| Washing      | (1) Methanol:water, 20:80 (v/v)                               | 10          |
|              | (2) Methanol:water, 25:75                                     | 10          |
| Elution      | Acetonitrile:water, 30:70 (segmented collecting 2-<br>7.5 ml) | 5.5         |

**Table S2** Recovery rate of different amount of ISO-MIP

| Amount of MIPs (g)       | 1.9   | 0.9   | 0.45  |
|--------------------------|-------|-------|-------|
| recovery rate (%)        |       |       |       |
| isoquercitrin            | 61.75 | 87.93 | 92.33 |
| hyperoside               | 73.81 | 93.00 | 66.25 |
| astragalin               | 55.73 | 83.25 | 88.32 |
| quercetin-7-O-glucoside  | 28.95 | 54.52 | 74.37 |
| quercetin-3'-O-glucoside | 0     | 7.16  | 45.77 |
